# Supplementary material for: Genome-wide Identification, Evolution and Expression Analysis of LBD Transcription Factors Family in Wheat (Triticum aestivum. L)
Source: Research Square preprint supplement (doi:10.21203/rs.3.rs-149082/v1), 2021-01-28
Supplement: Supplementary file 1 [file 91844c1d1584d63102e952c7.xlsx]

## Sheet: Title page
Genome-wide identification, evolution and expression analysis of LBD transcription factors family in wheat (Triticum aestivum. L)
Zhenyu Wang1, Ying Gao1, Fulin Huo1, Yijun Shi1, Wenqiu Pan1, Pengzheng Lei1, Weining Song1,2*, Xiaojun Nie1*
1State Key Laboratory of Crop Stress Biology in Arid Areas, College of Agronomy and Yangling Branch of China Wheat Improvement Center, Northwest A&F University, Yangling712100, Shaanxi, China;
2Australia-China Joint Research Centre for Abiotic and Biotic Stress Management in Agriculture, Horticulture and Forestry, Yangling712100, Shaanxi, China
*Corresponding authors:
Weining Song: songweining@nwsuaf.edu.cn
Xiaojun Nie: small@nwsuaf.edu.cn
Tel.: +86-29- 87082984
Fax: +86-29- 87082203
Address: 3 Taicheng Road, Yangling712100, Shaanxi, China

## Sheet: Table S1
Table S1. Cis-elements organizations of TaLBD genes
	3-AF3 binding site	ABRE	AE-box	ARE	AuxRR-core	Box II	CAT-box	CGTCA-motif	DRE core	G-Box	G-box	GA-motif	GARE-motif	GATA-motif	GATT-motif	GCN4_motif	GT1-motif	Gap-box	I-box	LTR	MBS	MBSI	MRE	MSA-like	O2-site	P-box	RY-element	SARE	Sp1	TATC-box	TC-rich	TC-rich repeats	TCA-element	TCCC-motif	TGA-element	TGACG-motif	box S	circadian
Ta-1A-LBD1	0	0	0	1	0	0	1	0	0	0	0	0	0	0	0	0	0	0	0	0	0	0	0	0	1	0	0	0	0	0	1	0	0	0	0	0	0	0
Ta-1A-LBD2	0	0	1	1	0	0	0	0	0	0	0	0	0	0	0	1	0	0	0	0	0	0	0	0	0	0	0	0	0	0	0	0	0	0	0	0	0	0
Ta-1A-LBD3	0	1	1	1	0	0	0	1	0	0	1	0	0	1	0	0	0	1	0	1	1	0	0	0	0	0	0	0	0	0	0	0	0	0	1	0	0	0
Ta-1A-LBD4	0	1	0	1	1	0	1	1	1	0	0	1	0	0	0	0	1	0	0	0	0	0	0	0	0	1	1	0	0	0	0	0	1	0	0	1	1	0
Ta-1B-LBD5	0	1	0	1	0	0	1	1	0	1	1	0	0	0	0	0	1	0	0	1	1	0	0	0	0	0	0	0	0	0	1	0	1	0	0	1	0	0
Ta-1B-LBD6	0	0	1	1	0	0	0	0	0	0	0	0	0	1	0	1	0	0	0	0	0	0	0	0	0	0	0	0	1	0	0	0	0	0	0	0	0	0
Ta-1B-LBD7	0	1	0	1	0	0	0	1	0	1	1	0	0	0	0	0	0	1	0	1	0	0	0	0	0	1	0	0	0	0	0	1	0	0	1	1	0	0
Ta-1B-LBD8	0	1	0	0	0	0	1	1	0	1	1	0	0	1	0	1	0	0	0	0	0	0	0	0	0	0	0	0	0	0	0	0	0	0	1	0	0	0
Ta-1D-LBD9	0	1	0	0	0	0	0	1	0	1	1	0	1	0	0	0	0	1	0	0	0	1	0	0	1	0	0	0	0	0	0	0	0	0	1	0	0	0
Ta-1D-LBD10	0	0	0	1	0	0	0	1	0	0	0	0	0	0	0	0	0	0	0	0	0	0	0	0	0	0	0	0	0	0	0	0	0	0	1	0	0	0
Ta-1D-LBD11	0	1	0	1	0	0	0	1	0	1	1	0	0	1	0	0	0	1	0	1	1	0	0	0	1	1	0	0	0	0	0	1	0	0	1	0	0	0
Ta-1D-LBD12	0	1	0	0	1	0	0	1	1	0	1	1	0	0	0	0	0	0	0	0	1	0	0	0	0	0	1	0	0	0	0	0	1	0	0	1	0	0
Ta-2A-LBD13	0	1	0	1	0	0	1	0	0	1	1	0	0	1	0	0	1	0	0	1	0	0	0	0	0	0	0	0	1	0	0	0	0	0	0	0	0	0
Ta-2A-LBD14	0	1	1	1	0	0	1	1	1	0	1	1	1	0	1	0	0	0	0	0	1	1	0	0	0	1	0	0	0	1	0	0	0	0	1	1	1	0
Ta-2B-LBD15	0	1	0	1	1	0	1	0	0	0	1	1	0	0	0	0	1	0	0	0	1	0	0	1	0	0	0	0	1	0	0	0	0	1	0	0	0	0
Ta-2B-LBD16	0	1	0	1	0	0	1	1	0	0	1	0	0	0	0	0	0	0	0	0	0	0	0	0	1	0	0	0	1	0	0	0	0	0	1	1	0	0
Ta-2D-LBD17	0	1	0	0	1	0	0	1	0	1	0	0	1	0	0	0	0	1	0	1	0	0	0	0	0	0	0	0	0	0	0	0	0	0	1	0	0	0
Ta-2D-LBD18	0	1	0	0	1	0	1	1	0	1	1	0	1	1	0	0	0	0	0	1	0	0	0	0	0	0	0	0	1	0	0	0	0	0	1	0	0	0
Ta-2D-LBD19	0	1	1	1	0	0	1	1	1	0	0	1	1	0	1	0	0	0	0	0	1	0	0	1	0	0	0	0	0	0	0	0	0	0	1	1	1	0
Ta-3A-LBD20	0	1	0	0	0	0	1	0	1	0	1	0	0	0	0	0	0	1	0	0	0	1	0	0	0	1	1	0	0	0	0	1	0	0	0	0	0	0
Ta-3A-LBD21	0	1	0	1	0	0	0	1	0	1	1	0	1	1	0	0	0	0	0	0	1	0	0	0	0	1	0	0	0	0	1	0	0	0	0	1	0	0
Ta-3A-LBD22	0	1	0	0	0	0	0	0	1	0	0	1	1	0	0	0	0	1	0	0	0	0	0	0	0	0	0	0	0	0	0	0	0	0	1	0	0	0
Ta-3A-LBD23	0	1	1	1	0	0	0	1	1	0	1	0	0	1	1	0	0	1	0	0	0	1	0	1	0	1	0	0	0	1	0	0	0	0	0	1	0	0
Ta-3A-LBD24	0	0	0	0	0	0	0	1	0	0	0	1	0	1	0	0	0	0	0	0	0	0	0	0	0	0	0	0	1	0	0	1	1	0	1	0	0	0
Ta-3A-LBD25	0	1	1	1	0	0	0	0	1	0	0	1	0	0	0	0	0	1	0	1	1	0	0	0	0	1	0	1	0	1	0	1	0	0	0	0	0	0
Ta-3A-LBD26	0	1	1	1	0	0	1	1	0	0	1	0	0	0	0	0	0	0	1	0	1	0	0	0	1	0	1	0	0	0	0	1	0	0	1	0	0	0
Ta-3B-LBD27	0	1	1	1	1	0	1	1	0	0	1	0	0	1	0	0	0	0	0	1	1	0	0	0	1	0	0	0	1	0	0	0	1	0	1	0	0	0
Ta-3B-LBD28	0	0	0	0	0	0	1	0	1	0	0	0	0	0	0	0	0	1	0	0	0	1	0	0	0	1	1	0	0	0	0	0	0	0	0	0	0	0
Ta-3B-LBD29	0	1	0	1	0	0	0	1	0	1	1	0	1	0	0	0	0	0	0	1	1	0	0	0	0	1	1	0	0	0	1	0	0	0	0	1	0	0
Ta-3B-LBD30	0	1	1	0	1	0	0	0	0	1	1	0	0	0	0	0	0	0	0	0	0	0	0	0	0	0	0	0	0	0	0	0	1	0	0	0	0	0
Ta-3B-LBD31	0	1	0	0	0	0	1	1	0	0	1	0	0	0	0	0	1	0	0	1	1	0	0	0	0	0	0	0	1	0	0	0	1	0	1	1	0	0
Ta-3B-LBD32	0	1	0	0	0	0	1	1	0	1	1	0	0	0	0	0	0	0	0	1	0	0	0	0	1	0	1	0	0	0	0	1	0	0	1	0	0	0
Ta-3D-LBD33	0	1	1	1	0	0	0	1	1	0	1	1	0	0	0	0	0	0	0	0	1	0	0	0	0	1	1	0	0	0	0	0	0	0	0	1	0	0
Ta-3D-LBD34	0	0	1	0	0	0	1	1	1	0	0	0	0	0	0	0	0	1	0	0	1	0	0	0	0	1	0	1	0	0	0	1	0	0	0	0	1	0
Ta-3D-LBD35	0	1	1	1	0	0	0	1	1	0	1	0	0	1	1	0	0	0	0	0	0	1	0	1	0	1	0	0	0	1	0	0	0	0	0	1	0	0
Ta-3D-LBD36	0	1	1	0	1	0	0	1	1	0	1	1	0	0	0	0	0	1	0	0	0	0	0	0	0	0	0	0	0	0	0	0	0	1	0	1	0	0
Ta-3D-LBD37	0	1	0	0	0	1	0	0	0	0	1	0	0	0	0	0	0	1	0	0	1	0	0	0	0	1	0	1	0	0	0	0	0	0	0	0	0	0
Ta-3D-LBD38	0	1	1	1	0	0	1	0	0	0	1	0	0	0	0	0	0	0	1	0	1	0	0	0	0	0	1	0	0	0	0	0	0	0	0	0	0	0
Ta-4A-LBD39	0	1	0	0	0	1	0	0	1	0	1	1	0	0	1	0	0	0	0	0	1	0	0	0	0	0	1	1	0	0	0	0	1	0	0	1	0	0
Ta-4A-LBD40	0	1	0	0	0	0	1	1	1	0	1	1	0	0	1	0	0	0	0	0	0	1	0	0	0	1	0	0	0	1	1	0	0	0	0	1	0	0
Ta-4A-LBD41	0	1	0	0	0	0	0	0	1	0	0	1	0	0	1	0	0	0	0	0	0	0	0	0	0	0	1	0	0	0	0	0	0	1	0	0	0	0
Ta-4A-LBD42	0	1	0	1	0	0	0	0	0	1	1	0	1	0	0	0	0	0	0	1	0	0	0	0	1	0	1	0	1	0	0	0	0	0	0	0	0	0
Ta-4A-LBD43	0	1	0	1	0	0	0	1	1	0	0	1	0	0	1	0	0	0	0	0	0	0	0	0	1	0	0	0	0	1	0	0	0	0	0	1	0	0
Ta-4A-LBD44	0	0	0	1	0	0	0	0	0	0	0	0	0	0	0	1	0	0	0	0	1	0	0	0	1	1	0	0	0	0	0	0	1	0	0	1	0	0
Ta-4A-LBD45	0	1	1	0	0	0	1	1	1	0	1	1	0	1	0	0	1	0	0	1	1	1	0	0	0	1	1	1	0	0	0	0	1	0	1	1	0	0
Ta-4A-LBD46	0	1	0	1	0	0	1	0	0	1	1	0	1	0	0	0	1	0	0	0	1	0	0	1	0	0	1	0	0	0	0	0	0	1	0	0	0	0
Ta-4B-LBD47	0	1	0	1	0	0	0	0	0	1	0	0	0	0	0	0	0	0	0	0	1	0	1	0	0	1	0	0	0	1	1	0	0	1	0	0	0	0
Ta-4B-LBD48	0	1	0	1	0	0	1	1	0	0	1	0	0	1	0	0	0	0	0	0	1	0	0	0	0	1	0	0	1	0	0	1	0	0	1	1	0	0
Ta-4B-LBD49	0	1	0	1	0	0	0	1	0	1	1	0	0	1	0	0	1	0	1	1	1	0	0	0	1	1	1	0	1	0	0	1	0	1	1	0	0	0
Ta-4B-LBD50	0	1	0	1	0	0	1	1	0	0	1	1	0	0	0	0	0	0	0	0	0	0	0	0	0	1	0	0	0	0	0	0	1	0	1	0	0	0
Ta-4B-LBD51	0	1	0	0	0	0	0	0	0	1	1	0	0	0	0	0	1	0	0	0	1	0	0	0	1	0	1	0	0	1	0	0	0	0	0	0	0	0
Ta-4B-LBD52	0	1	0	0	0	0	0	1	0	1	1	0	0	0	0	0	0	0	0	1	0	0	0	0	0	1	1	1	0	0	0	1	0	0	1	0	0	0
Ta-4B-LBD53	0	1	1	1	0	0	0	1	1	0	1	1	0	1	0	0	0	0	0	1	1	1	0	0	0	0	1	1	0	1	0	0	0	0	0	1	0	0
Ta-4B-LBD54	0	1	0	0	0	0	0	0	0	1	0	0	1	0	0	0	1	0	0	0	1	0	0	0	0	0	0	0	0	0	0	1	0	1	0	0	0	0
Ta-4B-LBD55	0	1	0	1	1	0	0	1	1	0	1	1	0	0	0	0	1	0	0	0	1	1	0	0	1	0	0	0	0	1	0	1	0	0	1	1	1	0
Ta-4B-LBD56	0	1	1	1	0	0	1	0	0	0	0	0	0	1	0	0	0	0	0	1	0	0	1	0	0	1	0	0	0	0	1	0	0	0	0	0	0	0
Ta-4B-LBD57	0	1	1	1	0	0	1	1	0	1	1	0	0	1	0	0	0	0	1	1	1	0	0	0	1	1	0	0	1	0	0	0	1	1	1	0	0	0
Ta-4D-LBD58	0	1	0	1	0	0	0	1	0	0	1	0	0	0	0	0	1	0	0	0	1	0	1	0	0	1	0	0	0	0	1	0	1	0	0	1	0	0
Ta-4D-LBD59	0	1	1	1	1	0	1	1	1	0	1	1	0	0	1	0	0	0	0	0	0	1	0	0	0	0	0	0	0	1	0	0	0	1	0	1	0	0
Ta-4D-LBD60	0	1	0	1	0	0	0	0	1	0	0	1	0	0	0	0	0	1	0	0	0	0	0	0	0	0	1	0	0	1	0	0	0	1	0	0	0	0
Ta-4D-LBD61	0	1	0	1	0	0	0	1	0	1	1	0	0	1	0	0	0	0	0	0	1	0	0	0	1	1	1	0	0	0	0	0	1	1	1	0	0	0
Ta-4D-LBD62	0	1	0	0	0	0	0	0	1	0	1	1	0	0	0	0	0	1	0	0	0	0	0	0	0	1	0	1	0	0	0	0	1	0	0	0	0	0
Ta-4D-LBD63	0	1	0	0	0	0	0	1	0	1	1	0	0	0	0	0	1	0	0	1	0	0	0	0	0	1	0	0	0	0	0	1	0	0	1	0	0	0
Ta-4D-LBD64	0	1	1	1	0	0	0	1	1	0	1	1	0	1	1	1	0	0	0	0	1	1	0	0	0	1	1	1	0	1	0	0	1	0	0	1	0	0
Ta-4D-LBD65	0	1	0	1	0	0	1	0	0	1	0	0	1	0	0	0	1	0	0	0	1	0	0	0	1	0	0	0	0	0	0	0	0	1	0	0	0	0
Ta-4D-LBD66	0	1	0	0	0	0	1	1	0	1	1	0	0	1	0	0	0	0	0	1	1	0	0	1	1	0	0	0	0	0	0	0	0	1	1	0	0	0
Ta-4D-LBD67	0	1	1	1	0	0	0	0	1	0	0	0	0	0	0	0	0	0	0	1	1	0	0	1	0	0	1	0	0	0	0	1	0	0	0	0	0	0
Ta-4D-LBD68	0	1	0	1	0	0	1	1	0	0	1	0	0	0	0	0	0	0	1	1	1	0	0	0	0	1	0	0	1	0	0	1	1	1	1	0	0	0
Ta-5A-LBD69	1	0	1	1	1	1	0	0	1	1	0	1	1	0	1	0	0	0	1	0	0	0	1	0	1	0	0	0	1	0	0	0	1	0	1	0	0	0
Ta-5A-LBD70	0	1	0	0	0	0	1	0	0	0	1	0	0	0	0	0	1	0	0	1	0	0	1	0	0	0	1	0	0	0	0	0	0	0	0	0	1	0
Ta-5A-LBD71	0	1	0	1	0	0	0	1	1	0	1	1	0	0	0	0	0	0	0	0	1	0	0	0	1	0	0	0	0	1	0	0	1	1	1	1	0	0
Ta-5A-LBD72	0	1	0	1	0	0	1	1	0	1	1	0	1	1	0	0	0	0	1	1	1	0	0	1	0	0	0	0	0	0	0	0	0	1	1	0	0	0
Ta-5A-LBD73	0	0	1	1	0	0	1	1	0	0	0	0	0	1	0	0	0	0	1	1	0	0	1	0	1	0	0	0	0	0	1	0	0	0	0	1	0	0
Ta-5A-LBD74	0	1	1	1	0	0	1	1	1	0	1	1	0	0	0	0	0	0	0	0	1	0	0	0	0	1	0	0	0	1	0	0	1	0	1	1	0	0
Ta-5B-LBD75	0	1	1	1	0	0	0	1	1	0	1	1	0	1	0	0	0	0	0	1	1	0	0	0	0	1	0	1	0	0	1	1	0	0	0	0	1	0
Ta-5B-LBD76	0	1	0	0	0	0	0	1	0	1	1	0	0	0	0	0	0	0	0	1	1	0	1	0	0	0	0	0	0	0	1	0	1	0	1	1	0	0
Ta-5B-LBD77	0	1	1	0	0	0	0	0	0	1	1	0	0	0	0	0	0	0	0	0	1	1	0	1	1	0	1	0	1	0	0	0	0	0	0	0	0	0
Ta-5D-LBD78	0	1	1	1	0	0	0	1	1	0	1	1	0	1	0	0	0	1	0	0	0	0	0	0	0	1	0	1	0	1	1	1	0	0	0	0	1	0
Ta-5D-LBD79	0	1	0	0	0	0	0	1	0	1	1	0	0	1	0	0	0	0	1	0	0	0	0	1	0	0	0	0	0	0	1	0	0	0	1	1	0	0
Ta-5D-LBD80	0	1	0	0	0	0	1	0	0	1	1	0	0	0	0	1	0	0	0	0	0	0	0	1	0	0	0	0	1	0	0	1	0	0	0	0	0	0
Ta-6A-LBD81	0	1	1	1	0	0	0	1	0	1	0	0	0	0	0	0	1	0	0	0	0	0	1	0	1	1	0	0	0	0	0	0	1	0	1	0	0	0
Ta-6A-LBD82	0	1	0	1	0	0	1	1	0	1	1	0	0	1	0	0	1	0	1	0	1	0	0	0	0	0	0	0	0	0	0	1	1	0	1	0	0	0
Ta-6B-LBD83	0	1	1	1	0	0	0	1	0	0	1	0	0	0	0	0	0	0	0	0	0	0	1	0	0	1	0	0	0	0	0	0	1	0	1	0	0	0
Ta-6B-LBD84	0	1	1	1	0	0	1	1	0	1	0	0	0	0	0	1	1	0	1	0	1	0	0	0	1	0	0	0	1	1	0	0	1	0	1	0	0	0
Ta-6D-LBD85	0	1	0	1	0	0	1	1	1	0	1	1	0	0	1	0	0	0	0	1	0	1	0	0	0	0	0	0	0	1	0	0	1	0	1	1	0	0
Ta-7A-LBD86	0	1	1	0	0	0	1	1	1	0	0	1	0	1	0	0	0	1	0	0	1	0	0	0	0	0	1	0	0	0	0	0	0	1	0	1	1	0
Ta-7A-LBD87	0	1	0	1	1	0	1	1	0	0	1	1	0	1	0	0	0	0	0	0	0	0	1	0	1	0	0	0	0	0	0	1	1	0	1	0	1	0
Ta-7B-LBD88	0	0	0	1	0	0	1	0	0	0	0	0	0	0	0	0	1	0	1	0	0	0	1	0	1	1	0	0	0	0	0	1	0	0	0	0	0	0
Ta-7D-LBD89	0	0	0	1	1	0	0	1	0	0	1	0	0	0	0	0	0	0	1	1	0	0	1	0	1	0	0	0	0	0	0	1	0	0	1	1	0	0
Ta-U-LBD90	0	1	0	1	0	0	1	1	0	0	1	0	0	1	0	0	0	0	1	1	1	0	1	0	1	0	0	0	0	0	0	0	1	0	1	0	0	0

## Sheet: Table S2
Table S2. Cis-elements statistics of TaLBD genes
Cis-elements	Nums	Function
3-AF3 binding site	1	part of a conserved DNA module array (CMA3)
ABRE	79	cis-acting element involved in the abscisic acid responsiveness
AE-box	32	part of a module for light response
ARE	59	cis-acting regulatory element essential for the anaerobic induction
AuxRR-core	13	cis-acting regulatory element involved in auxin responsiveness
Box II	2	part of a light responsive element
CAT-box	41	cis-acting regulatory element related to meristem expression
CGTCA-motif	62	cis-acting regulatory element involved in the MeJA-responsiveness
DRE core	31
G-Box	68	cis-acting regulatory element involved in light responsiveness
GA-motif	7	part of a light responsive element
GARE-motif	19	gibberellin-responsive element
GATA-motif	32	part of a light responsive element
GATT-motif	1	part of a light responsive element
GCN4_motif	9	cis-regulatory element involved in endosperm expression
GT1-motif	29	light responsive element
Gap-box	5	part of a light responsive element
I-box	19	part of a light responsive element
LTR	42	cis-acting element involved in low-temperature responsiveness
MBS	42	MYB binding site involved in drought-inducibility
MBSI	2	MYB binding site involved in flavonoid biosynthetic genes regulation
MRE	17	MYB binding site involved in light responsiveness
MSA-like	10	cis-acting element involved in cell cycle regulation
O2-site	40	cis-acting regulatory element involved in zein metabolism regulation
P-box	32	gibberellin-responsive element
RY-element	23	cis-acting regulatory element involved in seed-specific regulation
SARE	1	cis-acting element involved in salicylic acid responsiveness
Sp1	31	light responsive element
TATC-box	6	cis-acting element involved in gibberellin-responsiveness
TC-rich repeats	18	cis-acting element involved in defense and stress responsiveness
TCA-element	29	cis-acting element involved in salicylic acid responsiveness
TCCC-motif	23	part of a light responsive element
TGA-element	20	auxin-responsive element
TGACG-motif	62	cis-acting regulatory element involved in the MeJA-responsiveness
box S	13
circadian	7	cis-acting regulatory element involved in circadian control

## Sheet: Table S3
Table S3. SNP number found in the wheat LBD genes
A			B			D
Gene ID	Landraces	Varieties	Gene ID	Landraces	Varieties	Gene ID	Landraces	Varieties
Ta-1A-LBD1	3	1	Ta-1B-LBD5	0	0	Ta-1D-LBD10	10	13
Ta-1A-LBD2	2	28	Ta-1B-LBD7	3	15	Ta-1D-LBD11	0	3
Ta-1A-LBD3	1	0	Ta-1B-LBD8	5	1	Ta-1D-LBD12	0	1
Ta-1A-LBD4	20	23	Ta-1B-LBD9	21	8	Ta-1D-LBD13	0	6
Ta-2A-LBD14	5	3	Ta-2B-LBD16	1	15	Ta-2D-LBD18	3	6
Ta-2A-LBD15	4	5	Ta-2B-LBD17	1	10	Ta-2D-LBD20	1	4
Ta-3A-LBD22	2	4	Ta-3B-LBD29	1	6	Ta-2D-LBD21	1	1
Ta-3A-LBD23	0	2	Ta-3B-LBD30	1	5	Ta-3D-LBD35	0	2
Ta-3A-LBD24	0	0	Ta-3B-LBD31	0	4	Ta-3D-LBD36	0	2
Ta-3A-LBD25	0	1	Ta-3B-LBD32	5	6	Ta-3D-LBD37	0	0
Ta-3A-LBD26	5	2	Ta-3B-LBD33	2	8	Ta-3D-LBD38	0	1
Ta-3A-LBD27	21	16	Ta-3B-LBD34	5	4	Ta-3D-LBD39	2	5
Ta-3A-LBD28	11	11	Ta-4B-LBD49	4	4	Ta-3D-LBD40	3	5
Ta-4A-LBD41	2	2	Ta-4B-LBD50	17	19	Ta-4D-LBD60	3	0
Ta-4A-LBD42	4	6	Ta-4B-LBD51	2	2	Ta-4D-LBD61	0	6
Ta-4A-LBD43	3	3	Ta-4B-LBD52	2	8	Ta-4D-LBD62	0	1
Ta-4A-LBD44	11	14	Ta-4B-LBD53	1	1	Ta-4D-LBD63	1	5
Ta-4A-LBD45	23	27	Ta-4B-LBD54	2	4	Ta-4D-LBD64	1	3
Ta-4A-LBD46	1	2	Ta-4B-LBD55	2	3	Ta-4D-LBD65	0	2
Ta-4A-LBD47	4	4	Ta-4B-LBD56	4	5	Ta-4D-LBD66	0	0
Ta-4A-LBD48	4	5	Ta-4B-LBD57	1	2	Ta-4D-LBD67	0	5
Ta-5A-LBD71	0	1	Ta-4B-LBD58	12	11	Ta-4D-LBD68	1	1
Ta-5A-LBD72	6	11	Ta-4B-LBD59	18	3	Ta-4D-LBD69	0	9
Ta-5A-LBD73	1	3	Ta-5B-LBD77	3	4	Ta-4D-LBD70	0	0
Ta-5A-LBD74	3	2	Ta-5B-LBD78	0	1	Ta-5D-LBD80	1	1
Ta-5A-LBD75	4	5	Ta-5B-LBD79	2	6	Ta-5D-LBD81	2	0
Ta-5A-LBD76	5	1	Ta-6B-LBD85	11	27	Ta-5D-LBD82	1	4
Ta-6A-LBD83	17	22	Ta-6B-LBD86	20	12	Ta-6D-LBD87	9	11
Ta-6A-LBD84	11	11	Ta-7B-LBD90	26	24	Ta-7D-LBD91	10	4
Ta-7A-LBD88	0	0
Ta-7A-LBD89	10	16
Sum	183	231		172	218		49	101
Total	404	550

## Sheet: Table S4
Table S4. Pi valure of the wheat LBD genes
A subgenome			B subgenome			D subgenome
Gene ID	Landraces	Varieties	Gene ID	Landraces	Varieties	Gene ID	Landraces	Varieties
Ta-1A-LBD1	5.95323e-05	5.26787e-06	Ta-1B-LBD5	0	0	Ta-1D-LBD10	7.63625e-05	0.000126229
Ta-1A-LBD2	7.12053e-05	0.000171621	Ta-1B-LBD7	6.37037e-05	0.00013676	Ta-1D-LBD11	0	8.47254e-06
Ta-1A-LBD3	3.04904e-05	0	Ta-1B-LBD8	0.000128858	2.91048e-05	Ta-1D-LBD12	0	2.94118e-06
Ta-1A-LBD4	0.000129532	0.000116211	Ta-1B-LBD9	0.00021326	6.08882e-05	Ta-1D-LBD13	0	1.7384e-05
Ta-2A-LBD14	3.46663e-05	8.38479e-06	Ta-2B-LBD16	3.72053e-05	8.80008e-05	Ta-2D-LBD18	3.84782e-05	0.000127007
Ta-2A-LBD15	9.94615e-05	0.000100139	Ta-2B-LBD17	9.98185e-06	6.03679e-05	Ta-2D-LBD20	8.53017e-06	1.39162e-05
Ta-3A-LBD22	9.75203e-05	7.40587e-05	Ta-3B-LBD29	9.67978e-06	7.47659e-05	Ta-2D-LBD21	9.98185e-06	2.76562e-06
Ta-3A-LBD23	0	1.10625e-05	Ta-3B-LBD30	4.70054e-05	5.21522e-05	Ta-3D-LBD35	0	5.79459e-06
Ta-3A-LBD24	0	0	Ta-3B-LBD31	0	1.11506e-05	Ta-3D-LBD36	0	5.88235e-06
Ta-3A-LBD25	0	2.76562e-06	Ta-3B-LBD32	0.000151244	0.000152904	Ta-3D-LBD37	0	0
Ta-3A-LBD26	4.22876e-05	5.88235e-06	Ta-3B-LBD33	1.02238e-05	5.35567e-05	Ta-3D-LBD38	0	2.94118e-06
Ta-3A-LBD27	0.000502615	0.000116955	Ta-3B-LBD34	0.000128383	9.91249e-05	Ta-3D-LBD39	1.35511e-05	1.41796e-05
Ta-3A-LBD28	0.000387533	0.000170578	Ta-4B-LBD49	0.000104055	0.000119009	Ta-3D-LBD40	3.67828e-05	1.71206e-05
Ta-4A-LBD41	5.95301e-05	2.77005e-05	Ta-4B-LBD50	0.000298198	0.000371742	Ta-4D-LBD60	8.6813e-05	0
Ta-4A-LBD42	0.000122873	0.000127625	Ta-4B-LBD51	1.01029e-05	5.61906e-06	Ta-4D-LBD61	0	1.85703e-05
Ta-4A-LBD43	1.9601e-05	1.07116e-05	Ta-4B-LBD52	2.2807e-05	6.98013e-05	Ta-4D-LBD62	0	5.619e-06
Ta-4A-LBD44	0.000231857	0.000221115	Ta-4B-LBD53	3.32731e-06	5.619e-06	Ta-4D-LBD63	6.29168e-06	2.79199e-05
Ta-4A-LBD45	0.000776853	0.000835735	Ta-4B-LBD54	5.66243e-05	4.71043e-05	Ta-4D-LBD64	3.32731e-06	1.42671e-05
Ta-4A-LBD46	2.41984e-05	5.79459e-06	Ta-4B-LBD55	1.1132e-05	2.49357e-05	Ta-4D-LBD65	0	5.70683e-06
Ta-4A-LBD47	6.83062e-05	6.53244e-05	Ta-4B-LBD56	2.66186e-05	6.70808e-05	Ta-4D-LBD66	0	0
Ta-4A-LBD48	3.60586e-05	2.91931e-05	Ta-4B-LBD57	6.53362e-06	2.63835e-05	Ta-4D-LBD67	0	1.7033e-05
Ta-5A-LBD71	0	5.79456e-06	Ta-4B-LBD58	0.000335681	0.000382675	Ta-4D-LBD68	6.53362e-06	5.619e-06
Ta-5A-LBD72	0.000186348	0.000187813	Ta-4B-LBD59	0.000152502	9.04411e-05	Ta-4D-LBD69	0	7.14291e-05
Ta-5A-LBD73	6.77556e-06	2.07211e-05	Ta-5B-LBD77	0.000103149	9.40764e-05	Ta-4D-LBD70	0	0
Ta-5A-LBD74	8.85093e-05	8.53404e-05	Ta-5B-LBD78	0	2.8534e-06	Ta-5D-LBD80	6.77556e-06	2.94118e-06
Ta-5A-LBD75	1.68785e-05	3.63924e-05	Ta-5B-LBD79	6.17064e-05	7.9292e-05	Ta-5D-LBD81	6.53371e-06	0
Ta-5A-LBD76	5.45084e-05	5.44343e-06	Ta-6B-LBD85	0.000198658	0.000360189	Ta-5D-LBD82	6.77556e-06	2.195e-05
Ta-6A-LBD83	0.000365488	0.000457517	Ta-6B-LBD86	0.000443775	0.000371322	Ta-6D-LBD87	0.000243752	0.000237864
Ta-6A-LBD84	0.000261766	0.000278257	Ta-7B-LBD90	0.000695492	0.000854274	Ta-7D-LBD91	5.22693e-05	5.96154e-05
Ta-7A-LBD88	0	0
Ta-7A-LBD89	0.000292323	9.33773e-05
Mean	0.000131184	0.000105703		0.000114824	0.000130731		2.07848e-05	2.873e-05
Mean_ABD	8.89e-05	8.86e-05

## Sheet: Table S5
Table S5. Accession number and samples information of RNA-seq data using in this study
database	Treatment or Tissue	Project ID	Experiment Accession	Experiment Title
NCBI SRA	heat	PRJNA257938	SRX673845	heat stress for 6h replicate 2
			SRX673844	heat stress for 6h replicate 1
			SRX673843	heat stress for 1h replicate 2
			SRX673841	heat stress for 1h replicate 1
	salt	PRJNA293629	SRX1162598	salt stress for 48h
			SRX1162596	salt stress for 24h
			SRX1162594	salt stress for 12h
			SRX1162592	salt stress for 6h
			SRX1162597	salt control (no treatment) sample replicate 2
	cold	PRJNA253535	SRX625524	low temperature stress(4℃) replicate 1
			SRX625523	low temperature stress(4℃) replicate 2
			SRX625522	low temperature stress(4℃) replicate 3
			SRX625521	low temperature stress(23℃) replicate 1
			SRX625520	low temperature stress(23℃) replicate 2
			SRX625519	low temperature stress(23℃) replicate 3
	drought	PRJNA257938	SRX673840	drought stress for 6h replicate 2
			SRX673839	drought stress for 6h replicate 1
			SRX673838	drought stress for 1h replicate 2
			SRX673836	drought stress for 1h replicate 1
			SRX673835	drought control (no treatment) sample replicate 2
			SRX673834	drought control (no treatment) sample replicate 1
WHEAT URGI	grain		grain_Z75_rep1
			grain_Z75_rep2
			grain_Z85_rep1
			grain_Z85_rep2
	leaf		leaf_Z10_rep1
			leaf_Z10_rep2
			leaf_Z23_rep1
			leaf_Z23_rep2
			leaf_Z71_rep1
			leaf_Z71_rep2
	root		root_Z10_rep1
			root_Z10_rep2
			root_Z13_rep1
			root_Z13_rep2
			root_Z39_rep1
			root_Z39_rep2
	spike		spike_Z32_rep1
			spike_Z32_rep2
			spike_Z39_rep1
			spike_Z39_rep2
			spike_Z65_rep1
			spike_Z65_rep2
	stem		stem_Z30_rep1
			stem_Z30_rep2
			stem_Z32_rep1
			stem_Z32_rep2
			stem_Z65_rep1
			stem_Z65_rep2

## Sheet: Table S6
Table S6. The primers used in this study
Gene ID	Forward primer (5'-3')	Reverse primer (5'-3')
LBD1	GTCGAGGTGGACGCCTACTG	CCGCCGTCGACGACATAAAG
LBD5	CACTGGATGATGCACCAGTTACTC	CAAGCAAATTCATCAAGCAGGTC
LBD17	CTGGATGCATTCGTCACTCAAC	TCCAACAAATTCATCAAGCAGGTC
LBD44	GTATACACACCGGACTATACAGCC	CTAGTTGAGATATGCCGACTAGAGG
LBD47	GATTCACTCCACAAGCTGCAAG	CTCCTCCGAAGGAACTTGCATG
LBD58	GACAGTATCCACAGTAGCACCATG	ACATGCATGCTGTGACACCTAGTTG
LBD83	TGATGATGGTATCCACAGTAGCAC	CTCATGGAACATTCTAGTTTTGCAG
LBD90	CATGTCAACTAGGTGTCACATC	GCTCATGGAACATTCTACAACG
LBD81	GTATCCACAGTAGCACCATGCTTC	GATGTGACACCTAGTTGACATATGC
LBD14	GCATAGCTCACATCACCACCAC	GGTCCTTGAGTGTACGTGCTG
LBD16	GCACATTTACCTTGTGAAAACATAGAG	GCTATTGTCTGTACATTGCAACCATG
LBD19	CATCAATACATCACCACCACCCTC	GGTCCTTGAGTGTAGTACGTGCTG
GAPDH	GAGGTCATCGTCATCAACGACAG	GTTGGAGACGACCTGGATGTTC
